# Supplementary material for: Antimicrobial-Resistant Escherichia coli Strains and Their Plasmids in People, Poultry, and Chicken Meat in Laos
Source: Front Microbiol. 2021 Jul 26;12:708182. doi: 10.3389/fmicb.2021.708182 (PMC8350485; doi:10.3389/fmicb.2021.708182)
Supplement: Supplementary file 1 [file Table_1.XLSX]

## Sheet: Local people
Sample ID (IDs on the left indicate that >1 strain was isolated from the sample)	Strain ID	sample type	sampling date	Species ID (MALDI-TOF MS)	Strain group based on phenotype (EUCAST)	AMI	TIM2	AZT	P/T4	SXT	GEN	FEP	TOB	LEVO	DOX	CIP	MIN	MERO	FOT	TGC	ETP	IMI	DOR	COL	POL	TAZ	Check-MDR CT103XL-new (bla genes detected should be intended as "-group")	rep-PCR	Illumina WGS	ResFinder	PlasmidFinder	ST	cgST
EH01-18-02	EH01-18-02	human rectal swab	rainy season 2018	E. coli	CST-R	≤4 mg/L	64/2 mg/L	≤2 mg/L	≤8/4 mg/L	>4/76 mg/L	≤1 mg/L	≤2 mg/L	≤1 mg/L	≤1 mg/L	16 mg/L	≤0.25 mg/L	4 mg/L	≤1 mg/L	≤1 mg/L	≤0.25 mg/L	≤0.25 mg/L	≤1 mg/L	≤0.12 mg/L	>4 mg/L	>4 mg/L	≤1 mg/L		done	done	mcr-1.1, blaTEM1B, aadA1, aadA2, mdf(A), cmlA1, qnrS1, sul3, tet(A), dfrA12	IncFIA, IncR	4014	90921
EH01-18-04	EH01-18-04-A	human rectal swab	rainy season 2018	E. coli	ESC-R	≤4 mg/L	32/2 mg/L	16 mg/L	≤8/4 mg/L	>4/76 mg/L	≤1 mg/L	4 mg/L	≤1 mg/L	≤1 mg/L	8 mg/L	0.5 mg/L	4 mg/L	≤1 mg/L	>32 mg/L	0.5 mg/L	≤0.25 mg/L	≤1 mg/L	≤0.12 mg/L	≤0.25 mg/L	≤0.25 mg/L	4 mg/L	CTX-M-32 subgroup, TEM SNP WT	done	done	blaCTX-M-55, blaTEM-1B, aadA5, aph(3'')-lb, aph(6)-ld, mph(A), sul1, sul2, tet(A), dfrA17	IncFIA, IncFIB(A P001918), IncFII(pRSB107)	131	135528
EH02-18-07	EH02-18-07	human rectal swab	rainy season 2018	E. coli	ESC-R	≤4 mg/L	16/2 mg/L	8 mg/L	≤8/4 mg/L	≤0.5/9.5 mg/L	≤1 mg/L	≤2 mg/L	≤1 mg/L	≤1 mg/L	4 mg/L	≤0.25 mg/L	≤2 mg/L	≤1 mg/L	>32 mg/L	≤0.25 mg/L	≤0.25 mg/L	≤1 mg/L	≤0.12 mg/L	≤0.25 mg/L	1 mg/L	4 mg/L	CTX-M-15 subgroup	done	done	blaCTXM-15, mdf(A), qnrS1, tet(A)	IncFII	3489	86381
EH03-18-11	EH03-18-11	human rectal swab	rainy season 2018	E. coli	ESC-R	≤4 mg/L	32/2 mg/L	>16 mg/L	≤8/4 mg/L	>4/76 mg/L	≤1 mg/L	4 mg/L	≤1 mg/L	≤1 mg/L	>16 mg/L	≤0.25 mg/L	16 mg/L	≤1 mg/L	>32 mg/L	≤0.25 mg/L	≤0.25 mg/L	≤1 mg/L	≤0.12 mg/L	≤0.25 mg/L	≤0.25 mg/L	8 mg/L	CTX-M-9 group, CTX-M-15 subgroup, TEM SNP WT	done
EH04-18-16	EH04-18-16	human rectal swab	rainy season 2018	E. coli	ESC-R	≤4 mg/L	32/2 mg/L	≤2 mg/L	≤8/4 mg/L	≤0.5/9.5 mg/L	≤1 mg/L	≤2 mg/L	≤1 mg/L	≤1 mg/L	16 mg/L	0.5 mg/L	16 mg/L	≤1 mg/L	16 mg/L	≤0.25 mg/L	≤0.25 mg/L	≤1 mg/L	≤0.12 mg/L	≤0.25 mg/L	≤0.25 mg/L	≤1 mg/L	CTX-M-9 group	done
EH04-18-18	EH04-18-18	human rectal swab	rainy season 2018	E. coli	CST-R	≤4 mg/L	64/2 mg/L	≤2 mg/L	≤8/4 mg/L	>4/76 mg/L	>8 mg/L	≤2 mg/L	8 mg/L	≤1 mg/L	16 mg/L	0.5 mg/L	8 mg/L	≤1 mg/L	≤1 mg/L	≤0.25 mg/L	≤0.25 mg/L	≤1 mg/L	≤0.12 mg/L	>4 mg/L	4 mg/L	≤1 mg/L		done	done	blaOXA-10, mcr-1.1, aac(3)-Ild, aadA2, aph(3')-Ia, erm(B), mdf(A), mph(A), qnrS1, ARR-2, sul3, dfrA12, dfrA14	IncFIA(HI1), IncFIB(K), IncFII, IncY	5215	95817
EH05-18-22	EH05-18-22	human rectal swab	rainy season 2018	E. coli	ESC-R	≤4 mg/L	≤16/2 mg/L	8 mg/L	≤8/4 mg/L	≤0.5/9.5 mg/L	≤1 mg/L	≤2 mg/L	≤1 mg/L	≤1 mg/L	≤2 mg/L	0.5 mg/L	≤2 mg/L	≤1 mg/L	32 mg/L	≤0.25 mg/L	≤0.25 mg/L	≤1 mg/L	≤0.12 mg/L	≤0.25 mg/L	≤0.25 mg/L	4 mg/L	CTX-M-1 group	done
EH06-18-27	EH06-18-27-B	human rectal swab	rainy season 2018	E. coli	CST-R	≤4 mg/L	≤16/2 mg/L	≤2 mg/L	≤8/4 mg/L	>4/76 mg/L	≤1 mg/L	≤2 mg/L	≤1 mg/L	≤1 mg/L	8 mg/L	≤0.25 mg/L	≤2 mg/L	≤1 mg/L	≤1 mg/L	≤0.25 mg/L	≤0.25 mg/L	≤1 mg/L	≤0.12 mg/L	4 mg/L	4 mg/L	≤1 mg/L		done	done	blaTEM-1B, mcr-1.1, aadA1, mdf(A), cmlA1, qnrS13, sul3, dfrA15	IncFIA(HI1), IncFIB(K), p0111	9555	97044
EH06-18-30	EH06-18-30	human rectal swab	rainy season 2018	E. coli	ESC-R	≤4 mg/L	≤16/2 mg/L	8 mg/L	≤8/4 mg/L	>4/76 mg/L	≤1 mg/L	≤2 mg/L	≤1 mg/L	≤1 mg/L	16 mg/L	≤0.25 mg/L	4 mg/L	≤1 mg/L	>32 mg/L	≤0.25 mg/L	≤0.25 mg/L	≤1 mg/L	≤0.12 mg/L	≤0.25 mg/L	≤0.25 mg/L	2 mg/L	CTX-M-32 subgroup, TEM SNP WT	done
EH07-18-31	EH07-18-31	human rectal swab	rainy season 2018	E. coli	ESC-R	≤4 mg/L	≤16/2 mg/L	8 mg/L	≤8/4 mg/L	>4/76 mg/L	≤1 mg/L	≤2 mg/L	≤1 mg/L	≤1 mg/L	≤2 mg/L	≤0.25 mg/L	≤2 mg/L	≤1 mg/L	32 mg/L	≤0.25 mg/L	≤0.25 mg/L	≤1 mg/L	≤0.12 mg/L	≤0.25 mg/L	≤0.25 mg/L	4 mg/L	CTX-M-15 subgroup, TEM SNP WT	done
EH08-18-36	EH08-18-36	human rectal swab	rainy season 2018	E. coli	ESC-R	≤4 mg/L	32/2 mg/L	>16 mg/L	≤8/4 mg/L	>4/76 mg/L	>8 mg/L	≤2 mg/L	2 mg/L	≤1 mg/L	8 mg/L	≤0.25 mg/L	8 mg/L	≤1 mg/L	32 mg/L	≤0.25 mg/L	≤0.25 mg/L	≤1 mg/L	≤0.12 mg/L	≤0.25 mg/L	≤0.25 mg/L	8 mg/L	CTX-M-32 subgroup, TEM SNP WT	done	done	blaCTXM-55, aac(3)-IId, aadA24, mdf(A), mef(B), floR, qnrS1, sul2, sul3, tet(A), tet(M), dfrA12	IncFIA, IncHI1A, IncHI1B	542	122545
EH08-18-38	EH08-18-38	human rectal swab	rainy season 2018	E. coli	ESC-R	≤4 mg/L	64/2 mg/L	8 mg/L	≤8/4 mg/L	>4/76 mg/L	>8 mg/L	4 mg/L	4 mg/L	≤1 mg/L	8 mg/L	≤0.25 mg/L	≤2 mg/L	≤1 mg/L	>32 mg/L	≤0.25 mg/L	≤0.25 mg/L	≤1 mg/L	≤0.12 mg/L	≤0.25 mg/L	≤0.25 mg/L	8 mg/L	CTX-M-9 group, TEM SNP WT	done
EH09-18-41	EH09-18-41	human rectal swab	rainy season 2018	E. coli	CST-R	≤4 mg/L	≤16/2 mg/L	≤2 mg/L	≤8/4 mg/L	>4/76 mg/L	>8 mg/L	≤2 mg/L	4 mg/L	>8 mg/L	8 mg/L	>2 mg/L	16 mg/L	≤1 mg/L	≤1 mg/L	≤0.25 mg/L	≤0.25 mg/L	≤1 mg/L	≤0.12 mg/L	4 mg/L	2 mg/L	≤1 mg/L		done	done	mcr-3.1, blaTEM1B, aac(3)-IId, aadA1, aadA2, mdf(A), cmlA1, floR, sul2, sul3, tet(A), tet(M), dfrA12,	IncFIB, IncQ1, IncX1, IncY	3944	32146
EH10-18-47	EH10-18-47	human rectal swab	rainy season 2018	E. coli	CST-R	≤4 mg/L	≤16/2 mg/L	≤2 mg/L	≤8/4 mg/L	>4/76 mg/L	≤1 mg/L	≤2 mg/L	≤1 mg/L	≤1 mg/L	8 mg/L	≤0.25 mg/L	≤2 mg/L	≤1 mg/L	≤1 mg/L	≤0.25 mg/L	≤0.25 mg/L	≤1 mg/L	≤0.12 mg/L	4 mg/L	2 mg/L	≤1 mg/L		done	done	mcr-1.1, blaTEM1B, aph(3'')-Ib, aph(6)-Id, mdf(A), floR, qnrS1, sul2, tet(A), dfrA14	p0111	165	40030
EH10-18-50	EH10-18-50	human rectal swab	rainy season 2018	E. coli	ESC-R	≤4 mg/L	16 mg/L	16 mg/L	≤8/4 mg/L	>4/76 mg/L	≤1 mg/L	4 mg/L	≤1 mg/L	≤1 mg/L	8 mg/L	≤0.25 mg/L	≤2 mg/L	≤1 mg/L	>32 mg/L	≤0.25 mg/L	≤0.25 mg/L	≤1 mg/L	≤0.12 mg/L	≤0.25 mg/L	≤0.25 mg/L	4 mg/L	CTX-M-15 subgroup, TEM SNP WT	done	done	blaCTXM-15, blaTEM1A, aadA5, aph(3'')-Ib, aph(3')-Ia, aph(6)-Id, mdf(A), floR, qnrS1, sul2, tet(A), dfrA17	IncFIB, IncFII	226	81270
EH11-18-52	EH11-18-52	human rectal swab	rainy season 2018	E. coli	ESC-R	≤4 mg/L	≤16/2 mg/L	≤2 mg/L	≤8/4 mg/L	≤0.5/9.5 mg/L	>8 mg/L	≤2 mg/L	4 mg/L	≤1 mg/L	≤2 mg/L	≤0.25 mg/L	≤2 mg/L	≤1 mg/L	8 mg/L	≤0.25 mg/L	≤0.25 mg/L	≤1 mg/L	≤0.12 mg/L	≤0.25 mg/L	≤0.25 mg/L	≤1 mg/L	CTX-M-9 group	done
EH11-18-55	EH11-18-55	human rectal swab	rainy season 2018	E. coli	CST-R	≤4 mg/L	≤16/2 mg/L	≤2 mg/L	≤8/4 mg/L	>4/76 mg/L	≤1 mg/L	≤2 mg/L	≤1 mg/L	≤1 mg/L	≤2 mg/L	≤0.25 mg/L	≤2 mg/L	≤1 mg/L	≤1 mg/L	≤0.25 mg/L	≤0.25 mg/L	≤1 mg/L	≤0.12 mg/L	>4 mg/L	4 mg/L	≤1 mg/L		done	done	mcr-1.1, aadA1, mdf(A), qnrS1, sul3, dfrA14	IncFIA, IncFIB, IncHI1A, IncHI1B, p0111	175	31835
EH12-18-57	EH12-18-57	human rectal swab	rainy season 2018	E. coli	ESC-R	≤4 mg/L	≤16/2 mg/L	16 mg/L	≤8/4 mg/L	>4/76 mg/L	>8 mg/L	≤2 mg/L	2 mg/L	≤1 mg/L	16 mg/L	≤0.25 mg/L	≤2 mg/L	≤1 mg/L	32 mg/L	≤0.25 mg/L	≤0.25 mg/L	≤1 mg/L	≤0.12 mg/L	≤0.25 mg/L	≤0.25 mg/L	8 mg/L	CTX-M-32 subgroup	done
EH12-18-60	EH12-18-60	human rectal swab	rainy season 2018	E. coli	ESC-R	≤4 mg/L	≤16/2 mg/L	≤2 mg/L	≤8/4 mg/L	≤0.5/9.5 mg/L	≤1 mg/L	≤2 mg/L	≤1 mg/L	≤1 mg/L	≤2 mg/L	≤0.25 mg/L	≤2 mg/L	≤1 mg/L	8 mg/L	0.5 mg/L	≤0.25 mg/L	≤1 mg/L	≤0.12 mg/L	≤0.25 mg/L	≤0.25 mg/L	≤1 mg/L	CTX-M-9 group	done	done	blaCTX-M-14, aph(3'')-lb, mdf(A)	IncX1, IncY	1081	90277

## Sheet: Chicken meat
Sample ID (IDs on the left indicate that >1 strain was isolated from the sample)	Strain ID	sample type	sampling date	Species ID (MALDI-TOF MS)	Strain group based on phenotype (EUCAST)	AMI	TIM2	AZT	P/T4	SXT	GEN	FEP	TOB	LEVO	DOX	CIP	MIN	MERO	FOT	TGC	ETP	IMI	DOR	COL	POL	TAZ	Check-MDR CT103XL-new (bla genes detected should be intended as "-group")	rep-PCR	Illumina WGS	ResFinder	PlasmidFinder	ST	cgST
EM03-18-06	EM03-18-06	chicken meat	rainy season 2018	E. coli	CST-R/ESC-R	≤4 mg/L	≤16/2 mg/L	16 mg/L	≤8/4 mg/L	>4/76 mg/L	>8 mg/L	4 mg/L	4 mg/L	>8 mg/L	8 mg/L	>2 mg/L	4 mg/L	≤1 mg/L	32 mg/L	≤0.25 mg/L	≤0.25 mg/L	≤1 mg/L	≤0.12 mg/L	4 mg/L	4 mg/L	4 mg/L	CTX-M-32 subgroup, TEM SNP WT, MCR-1	done	done	blaCTX-M-55, mcr-1.1, aph(3'')-lb, aph(6)-ld, aac(3)-lld, aadA2, mdf(A), qnrS1, sul2, sul3, tet(A), tet(B), dfrA12	IncFIB(A P001918), IncFII, IncX1, IncX4	617	8237
EM03-18-08	EM03-18-08	chicken meat	rainy season 2018	E. coli	CST-R	≤4 mg/L	≤16/2 mg/L	≤2 mg/L	≤8/4 mg/L	>4/76 mg/L	4 mg/L	≤2 mg/L	8 mg/L	>8 mg/L	8 mg/L	>2 mg/L	4 mg/L	≤1 mg/L	≤1 mg/L	≤0.25 mg/L	≤0.25 mg/L	≤1 mg/L	≤0.12 mg/L	4 mg/L	4 mg/L	≤1 mg/L		done	done	mcr-3.5, blaTEM1B, aac(3)-IV, aadA1, aadA2, aph(3')-Ia, aph(4)-Ia, mdf(A), mef(B), cmlA1, floR, sul2, sul3, tet(A), dfrA12,	IncFIA, IncFIB, IncFII	10	39835
EM06-18-14	EM06-18-14	chicken meat	rainy season 2018	E. coli	CARBA-R	>32 mg/L	>128/2 mg/L	16 mg/L	>64/4 mg/L	>4/76 mg/L	>8 mg/L	>16 mg/L	>8 mg/L	>8 mg/L	>16 mg/L	>2 mg/L	>16 mg/L	8 mg/L	>32 mg/L	≤0.25 mg/L	>4 mg/L	4 mg/L	>2 mg/L	≤0.25 mg/L	≤0.25 mg/L	>16 mg/L	CTX-M-9 group, TEM SNP WT, CARBA-gene NDM	done	done	blaCTXM-65, blaNDM5, blaTEM1B, aac(3)-IV, aadA2, aph(3')-Ia, aph(4)-Ia, rmtB, fosA3, mdf(A), floR, sul1, sul2, tet(B), dfrA12,	IncFII	156	87293
EM07-18-20	EM07-18-20	chicken meat	rainy season 2018	E. coli	ESC-R	≤4 mg/L	≤16/2 mg/L	8 mg/L	≤8/4 mg/L	>4/76 mg/L	≤1 mg/L	≤2 mg/L	≤1 mg/L	4 mg/L	16 mg/L	>2 mg/L	≤2 mg/L	≤1 mg/L	16 mg/L	1 mg/L	≤0.25 mg/L	≤1 mg/L	≤0.12 mg/L	≤0.25 mg/L	≤0.25 mg/L	≤1 mg/L	CTX-M-9 group, TEM SNP WT	done	done	blaCTXM-65, blaTEM1B, aadA5, aph(3'')-Ib, aph(6)-Id, fosA3, mdf(A), mph(A), floR, sul1, sul2, dfrA17,	IncFIB, IncFIC, IncI2	162	39191
EM07-18-22	EM07-18-22	chicken meat	rainy season 2018	E. coli	ESC-R	≤4 mg/L	32/2 mg/L	16 mg/L	≤8/4 mg/L	>4/76 mg/L	≤1 mg/L	≤2 mg/L	8 mg/L	≤1 mg/L	≤2 mg/L	2 mg/L	≤2 mg/L	≤1 mg/L	>32 mg/L	≤0.25 mg/L	≤0.25 mg/L	≤1 mg/L	≤0.12 mg/L	≤0.25 mg/L	≤0.25 mg/L	≤1 mg/L	CTX-M-9 group	done	done	aac(6')-lb-cr, blaCTX-M-65, blaOXA-1, mdf(A), catB3, ARR-3, dfrA17	IncFIB(AP001918), IncFIC(FII), IncY	2179	122779
EM08-18-25	EM08-18-25	chicken meat	rainy season 2018	E. coli	ESC-R	≤4 mg/L	32/2 mg/L	8 mg/L	≤8/4 mg/L	>4/76 mg/L	8 mg/L	≤2 mg/L	>8 mg/L	8 mg/L	16 mg/L	≤0.25 mg/L	>16 mg/L	≤1 mg/L	8 mg/L	≤0.25 mg/L	≤0.25 mg/L	≤1 mg/L	≤0.12 mg/L	≤0.25 mg/L	≤0.25 mg/L	≤1 mg/L	CTX-M-9 group, TEM SNP WT	done	done	blaCTXM-65, blaTEM1B, aac(3)-IV, aadA1, aph(3'')-Ib, aph(4)-Ia, aph(6)-Id, fosA3, mdf(A), floR, sul1, sul2, dfrA1,	IncFIB, IncFIC, IncI1-I(Gamma), IncQ1	23	56751
EM09-18-27	EM09-18-27	chicken meat	rainy season 2018	E. coli	ESC-R	≤4 mg/L	≤16/2 mg/L	8 mg/L	≤8/4 mg/L	>4/76 mg/L	≤1 mg/L	4 mg/L	≤1 mg/L	≤1 mg/L	8 mg/L	≤0.25 mg/L	4 mg/L	≤1 mg/L	32 mg/L	≤0.25 mg/L	≤0.25 mg/L	≤1 mg/L	≤0.12 mg/L	≤0.25 mg/L	≤0.25 mg/L	4 mg/L	CTX-M-15 subgroup, TEM SNP WT	done	done	blaCTXM-15, blaTEM1A, aadA5, aph(3'')-Ib, aph(6)-Id, mdf(A), floR, qnrS1, sul2, tet(A), dfrA17	IncFIB, IncFII	226	81270
EM10-18-28	EM10-18-28	chicken meat	rainy season 2018	E. coli	CST-R	≤4 mg/L	≤16/2 mg/L	≤2 mg/L	≤8/4 mg/L	>4/76 mg/L	≤1 mg/L	≤2 mg/L	≤1 mg/L	≤1 mg/L	>16 mg/L	≤0.25 mg/L	16 mg/L	≤1 mg/L	≤1 mg/L	0.5 mg/L	≤0.25 mg/L	≤1 mg/L	≤0.12 mg/L	>4 mg/L	4 mg/L	≤1 mg/L		done	done	mcr-1.1, mcr-1.6, blaTEM1A, mdf(A), floR, qnrS1, sul2, tet(A), tet(B), dfrA14	IncP1, p0111	648	39741
EM10-18-30	EM10-18-30	chicken meat	rainy season 2018	E. coli	CST-R/ESC-R	≤4 mg/L	32/2 mg/L	>16 mg/L	≤8/4 mg/L	>4/76 mg/L	≤1 mg/L	16 mg/L	≤1 mg/L	8 mg/L	16 mg/L	>2 mg/L	≤2 mg/L	≤1 mg/L	>32 mg/L	≤0.25 mg/L	≤0.25 mg/L	≤1 mg/L	≤0.12 mg/L	>4 mg/L	4 mg/L	16 mg/L	CTX-M-32 subgroup, TEM SNP WT, MCR-1	done	done	blaCTX-M-55, blaTEM-1B, mcr-1.1, aadA1, aph(3??)-lb, aph(&)-ld, mdf(A), sul1, sul2, dfrA1	IncFIB(A P001918), IncFIC(FII), Inc1-I(Gamma), Incl2(Delta)	2505	39108
EM11-18-32	EM11-18-32	chicken meat	rainy season 2018	E. coli	ESC-R	≤4 mg/L	32/2 mg/L	8 mg/L	≤8/4 mg/L	>4/76 mg/L	≤1 mg/L	≤2 mg/L	8 mg/L	≤1 mg/L	≤2 mg/L	2 mg/L	≤2 mg/L	≤1 mg/L	>32 mg/L	0.5 mg/L	≤0.25 mg/L	≤1 mg/L	≤0.12 mg/L	≤0.25 mg/L	≤0.25 mg/L	≤1 mg/L	CTX-M-9 group	done
EM18-18-42	EM18-18-42	chicken meat	rainy season 2018	E. coli	CST-R/ESC-R	≤4 mg/L	≤16/2 mg/L	≤2 mg/L	≤8/4 mg/L	≤0.5/9.5 mg/L	≤1 mg/L	≤2 mg/L	≤1 mg/L	≤1 mg/L	16 mg/L	≤0.25 mg/L	4 mg/L	≤1 mg/L	2 mg/L	0.5 mg/L	≤0.25 mg/L	≤1 mg/L	≤0.12 mg/L	>4 mg/L	>4 mg/L	≤1 mg/L		done	done	blaCTX-M-14, (blaTEM-? Partial at contig break, mcr-1.1, mph(A), qnrS1, tet(A)	IncFIA(HI1), IncHI1A, IncHI1B(R27), IncX1	11225	47189
EM20-18-50	EM20-18-50	chicken meat	rainy season 2018	E. coli	CST-R	≤4 mg/L	≤16/2 mg/L	≤2 mg/L	≤8/4 mg/L	>4/76 mg/L	≤1 mg/L	≤2 mg/L	≤1 mg/L	≤1 mg/L	4 mg/L	≤0.25 mg/L	≤2 mg/L	≤1 mg/L	≤1 mg/L	≤0.25 mg/L	≤0.25 mg/L	≤1 mg/L	≤0.12 mg/L	>4 mg/L	>4 mg/L	≤1 mg/L		done	done	mcr-1.-, mdf(A), qnrS1, sul2, tet(A), dfrA14	IncFIB(K), IncP1, p0111	1585	31409
EM22-18-53	EM22-18-53	chicken meat	rainy season 2018	E. coli	ESC-R	≤4 mg/L	32/2 mg/L	4 mg/L	≤8/4 mg/L	>4/76 mg/L	4 mg/L	≤2 mg/L	8 mg/L	8 mg/L	8 mg/L	>2 mg/L	≤2 mg/L	≤1 mg/L	8 mg/L	0.5 mg/L	≤0.25 mg/L	≤1 mg/L	≤0.12 mg/L	≤0.25 mg/L	≤0.25 mg/L	≤1 mg/L	CTX-M-9 group, TEM SNP WT	done	done	blaCTX-M-65, blTEM-1B, aac(3)-IV, aph(3'')-lb, aph(4)-Ia, aph(6)-Id, fosA3, mdf(A), sul1, sul2, tet(A), dfrA1	Colp VC, IncFIB(A P001918, IncFIC(FII), IncI1-I(Gamma)	23	56751
EM22-18-54	EM22-18-54	chicken meat	rainy season 2018	E. coli	CST-R/ESC-R	≤4 mg/L	32/2 mg/L	>16 mg/L	≤8/4 mg/L	>4/76 mg/L	>8 mg/L	8 mg/L	8 mg/L	>8 mg/L	16 mg/L	>2 mg/L	16 mg/L	≤1 mg/L	>32 mg/L	0.5 mg/L	≤0.25 mg/L	≤1 mg/L	≤0.12 mg/L	>4 mg/L	4 mg/L	16 mg/L	CTX-M-32 subgroup, TEM SNP WT, MCR-1	done
EM22-18-55	EM22-18-55-B	chicken meat	rainy season 2018	E. coli	ESC-R	≤4 mg/L	≤16/2 mg/L	8 mg/L	≤8/4 mg/L	≤0.5/9.5 mg/L	≤1 mg/L	4 mg/L	≤1 mg/L	≤1 mg/L	8 mg/L	≤0.25 mg/L	≤2 mg/L	≤1 mg/L	32 mg/L	≤0.25 mg/L	≤0.25 mg/L	≤1 mg/L	≤0.12 mg/L	≤0.25 mg/L	≤0.25 mg/L	2 mg/L	CTX-M-9 group	done
EM23-18-56	EM23-18-56	chicken meat	rainy season 2018	E. coli	CST-R/ESC-R	≤4 mg/L	64/2 mg/L	>16 mg/L	≤8/4 mg/L	>4/76 mg/L	>8 mg/L	>16 mg/L	>8 mg/L	>8 mg/L	8 mg/L	>2 mg/L	≤2 mg/L	≤1 mg/L	>32 mg/L	≤0.25 mg/L	≤0.25 mg/L	≤1 mg/L	≤0.12 mg/L	>4 mg/L	>4 mg/L	>16 mg/L	CTX-M-1 group, TEM SNP WT, MCR-1	done	done	mcr-1.1, blaCTXM-123, blaOXA-1, blaTEM1B, aac(3)-IV, aac(6')-Ib-cr, aph(3'')-Ib, aph(4)-Ia, aph(6)-Id, fosA3, mdf(A), mph(A), catB3, floR, aac(6')-Ib-cr, oqxA, oqxB, qnrS1, ARR-3, sul1, sul2, tet(A),dfrA17	IncFIB, IncFIC, IncHI2, IncHI2A, IncI2 (Delta)	165	86233
EM23-18-58	EM23-18-58	chicken meat	rainy season 2018	E. coli	ESC-R	≤4 mg/L	≤16/2 mg/L	4 mg/L	≤8/4 mg/L	>4/76 mg/L	≤1 mg/L	≤2 mg/L	≤1 mg/L	≤1 mg/L	8 mg/L	≤0.25 mg/L	≤2 mg/L	≤1 mg/L	8 mg/L	0.5 mg/L	≤0.25 mg/L	≤1 mg/L	≤0.12 mg/L	≤0.25 mg/L	≤0.25 mg/L	≤1 mg/L	CTX-M-1 group, TEM SNP WT	done	done	blaCTXM-15, blaTEM1B, aph(3'')-Ib, aph(6)-Id, mdf(A), qnrS1, sul2, tet(A), dfrA14	IncFIB(A P001918), IncFIC(FII), IncHI2, IncHI2A, IncI2(Delta)	58	135977

## Sheet: Poultry
Sample ID (IDs on the left indicate that >1 strain was isolated from the sample)	Strain ID	sample type	sampling date	Species ID (MALDI-TOF MS)	Strain group based on phenotype (EUCAST)	AMI	TIM2	AZT	P/T4	SXT	GEN	FEP	TOB	LEVO	DOX	CIP	MIN	MERO	FOT	TGC	ETP	IMI	DOR	COL	POL	TAZ	Check-MDR CT103XL-new (bla genes detected should be intended as "-group")	rep-PCR	Illumina WGS	ResFinder	PlasmidFinder	ST	cgST
EF1-18-01	EF1-18-01	chicken stool	rainy season 2018	E. coli	ESC-R	≤4 mg/L	64/2 mg/L	>16 mg/L	≤8/4 mg/L	>4/76 mg/L	>8 mg/L	16 mg/L	4 mg/L	8 mg/L	8 mg/L	>2 mg/L	≤2 mg/L	≤1 mg/L	>32 mg/L	≤0.25 mg/L	≤0.25 mg/L	≤1 mg/L	≤0.12 mg/L	≤0.25 mg/L	≤0.25 mg/L	16 mg/L	CTX-M-32 subgroup, TEM SNP WT	done	done	blaCTX-M-55, blaTEM-1B, aadA2, aph(3'')-lb, aph(6)-ld, mph(A), sul1, sul2, tet(A), dfrA12	none detected	1011	111265
EF1-18-04	EF1-18-04	chicken stool	rainy season 2018	E. coli	ESC-R	≤4 mg/L	32/2 mg/L	>16 mg/L	≤8/4 mg/L	>4/76 mg/L	>8 mg/L	16 mg/L	4 mg/L	4 mg/L	8 mg/L	>2 mg/L	≤2 mg/L	≤1 mg/L	>32 mg/L	≤0.25 mg/L	≤0.25 mg/L	≤1 mg/L	≤0.12 mg/L	≤0.25 mg/L	≤0.25 mg/L	16 mg/L	CTX-M-9 group, TEM SNP WT	done
EF1-18-05	EF1-18-05	chicken stool	rainy season 2018	E. coli	ESC-R	≤4 mg/L	32/2 mg/L	>16 mg/L	≤8/4 mg/L	>4/76 mg/L	>8 mg/L	16 mg/L	4 mg/L	8 mg/L	>16 mg/L	>2 mg/L	8 mg/L	≤1 mg/L	>32 mg/L	≤0.25 mg/L	≤0.25 mg/L	≤1 mg/L	≤0.12 mg/L	≤0.25 mg/L	≤0.25 mg/L	16 mg/L	CTX-M-32 subgroup	done
EF1-18-06	EF1-18-06-B	chicken stool	rainy season 2018	E. coli	ESC-R	≤4 mg/L	32/2 mg/L	>16 mg/L	≤8/4 mg/L	>4/76 mg/L	>8 mg/L	8 mg/L	2 mg/L	8 mg/L	8 mg/L	>2 mg/L	≤2 mg/L	≤1 mg/L	>32 mg/L	≤0.25 mg/L	≤0.25 mg/L	≤1 mg/L	≤0.12 mg/L	≤0.25 mg/L	≤0.25 mg/L	16 mg/L	CTX-M-9 group	done	done	blaCTX-M, aph(3'')-lb, aph(6)-ld, mdf(A), sul2, tet(A)	Col156, Incl2(Delta), p0111	162	131640
EF1-18-07	EF1-18-07	chicken stool	rainy season 2018	E. coli	ESC-R	≤4 mg/L	32/2 mg/L	4 mg/L	≤8/4 mg/L	≤0.5/9.5 mg/L	≤1 mg/L	4 mg/L	≤1 mg/L	≤1 mg/L	≤2 mg/L	≤0.25 mg/L	≤2 mg/L	≤1 mg/L	32 mg/L	≤0.25 mg/L	≤0.25 mg/L	≤1 mg/L	≤0.12 mg/L	≤0.25 mg/L	≤0.25 mg/L	≤1 mg/L	CTX-M-9 group	done
EF2-18-09	EF2-18-09	chicken stool	rainy season 2018	E. coli	CST-R	≤4 mg/L	≤16/2 mg/L	≤2 mg/L	≤8/4 mg/L	1/19 mg/L	≤1 mg/L	≤2 mg/L	≤1 mg/L	≤1 mg/L	8 mg/L	≤0.25 mg/L	≤2 mg/L	≤1 mg/L	≤1 mg/L	≤0.25 mg/L	≤0.25 mg/L	≤1 mg/L	≤0.12 mg/L	>4 mg/L	4 mg/L	≤1 mg/L		done	done	blaTEM-1B, mcr-1.1, aadA1, mdf(A), qnrS1, tet(A), dfrA1	IncX4, p0111	1630	39790
EF3-18-22	EF3-18-22	chicken stool	rainy season 2018	E. coli	CST-R	≤4 mg/L	≤16/2 mg/L	≤2 mg/L	≤8/4 mg/L	≤0.5/9.5 mg/L	>8 mg/L	≤2 mg/L	8 mg/L	≤1 mg/L	16 mg/L	≤0.25 mg/L	≤2 mg/L	≤1 mg/L	≤1 mg/L	≤0.25 mg/L	≤0.25 mg/L	≤1 mg/L	≤0.12 mg/L	>4 mg/L	4 mg/L	≤1 mg/L		done	done	mcr-1.1, blaTEM1B , aac(3)-IId, mdf(A), qnrS13, tet(A)	IncFIB, p0111, Col156	11090	137946
EF4-18-32	EF4-18-32-C	chicken stool	rainy season 2018	E. coli	CST-R	≤4 mg/L	≤16/2 mg/L	≤2 mg/L	≤8/4 mg/L	>4/76 mg/L	>8 mg/L	≤2 mg/L	4 mg/L	8 mg/L	≤2 mg/L	>2 mg/L	≤2 mg/L	≤1 mg/L	≤1 mg/L	≤0.25 mg/L	≤0.25 mg/L	≤1 mg/L	≤0.12 mg/L	4 mg/L	4 mg/L	≤1 mg/L		done	done	mcr-1.1, aac(3)-IId, mdf(A), sul3, dfrA14,	IncFIB, IncFIC, p0111	2179	32164
EF5-18-41	EF5-18-41	chicken stool	rainy season 2018	E. coli	CST-R	≤4 mg/L	32/2 mg/L	≤2 mg/L	≤8/4 mg/L	>4/76 mg/L	>8 mg/L	≤2 mg/L	4 mg/L	>8 mg/L	>16 mg/L	>2 mg/L	8 mg/L	≤1 mg/L	≤1 mg/L	≤0.25 mg/L	≤0.25 mg/L	≤1 mg/L	≤0.12 mg/L	>4 mg/L	4 mg/L	≤1 mg/L		done	done	mcr-1.1, blaTEM1B , aac(3)-IId, aadA1, aadA2, mdf(A), cmlA1, floR, sul2, sul3, tet(A), tet(M), dfrA12,	IncFIA, IncFIB, IncI2, IncP1, IncB/O/K/Z, Col156	69	32650
EF6-18-49	EF6-18-49	chicken stool	rainy season 2018	E. coli	ESC-R	≤4 mg/L	≤16/2 mg/L	>16 mg/L	≤8/4 mg/L	2/38 mg/L	≤1 mg/L	≤2 mg/L	≤1 mg/L	≤1 mg/L	8 mg/L	≤0.25 mg/L	≤2 mg/L	≤1 mg/L	8 mg/L	≤0.25 mg/L	≤0.25 mg/L	≤1 mg/L	≤0.12 mg/L	≤0.25 mg/L	≤0.25 mg/L	≤1 mg/L	CTX-M-9 group	done
EF7-18-51	EF7-18-51	chicken stool	rainy season 2018	E. coli	CST-R	≤4 mg/L	≤16/2 mg/L	≤2 mg/L	≤8/4 mg/L	>4/76 mg/L	>8 mg/L	≤2 mg/L	4 mg/L	8 mg/L	16 mg/L	>2 mg/L	8 mg/L	≤1 mg/L	≤1 mg/L	≤0.25 mg/L	≤0.25 mg/L	≤1 mg/L	≤0.12 mg/L	>4 mg/L	4 mg/L	≤1 mg/L		done	done	mcr-1.1, blaTEM1B, aac(3)-IId, aadA1, aadA2b, aph(3'')-Ib, aph(6)-Id, mdf(A), cmlA1, sul3, tet(A), dfrA15,	IncX4, ColE10, p0111	48	39128
EF7-18-53	EF7-18-53	chicken stool	rainy season 2018	E. coli	ESC-R	≤4 mg/L	≤16/2 mg/L	8 mg/L	≤8/4 mg/L	1/19 mg/L	≤1 mg/L	≤2 mg/L	≤1 mg/L	>8 mg/L	>16 mg/L	>2 mg/L	≤2 mg/L	≤1 mg/L	32 mg/L	≤0.25 mg/L	≤0.25 mg/L	≤1 mg/L	≤0.12 mg/L	≤0.25 mg/L	≤0.25 mg/L	4 mg/L	CTX-M-15 subgroup	done	done	blaCTXM-15, aph(3'')-Ib, aph(6)-Id, mdf(A), tet(A), dfrA15,	IncFIB, p0111	4981	38972
EF7-18-54	EF7-18-54	chicken stool	rainy season 2018	E. coli	ESC-R	≤4 mg/L	≤16/2 mg/L	8 mg/L	≤8/4 mg/L	1/19 mg/L	≤1 mg/L	≤2 mg/L	≤1 mg/L	>8 mg/L	16 mg/L	>2 mg/L	≤2 mg/L	≤1 mg/L	32 mg/L	≤0.25 mg/L	≤0.25 mg/L	≤1 mg/L	≤0.12 mg/L	≤0.25 mg/L	≤0.25 mg/L	4 mg/L	CTX-M-15 subgroup	done	done	blaCTXM-15, aph(3'')-Ib, aph(6)-Id, mdf(A), tet(A, dfrA15,	IncFIB, p0111	4981	38972
EF7-18-55	EF7-18-55	chicken stool	rainy season 2018	E. coli	ESC-R	≤4 mg/L	≤16/2 mg/L	4 mg/L	≤8/4 mg/L	>4/76 mg/L	>8 mg/L	≤2 mg/L	4 mg/L	>8 mg/L	16 mg/L	>2 mg/L	4 mg/L	≤1 mg/L	8 mg/L	≤0.25 mg/L	≤0.25 mg/L	≤1 mg/L	≤0.12 mg/L	≤0.25 mg/L	≤0.25 mg/L	2 mg/L	CTX-M-32 subgroup	done	done	blaCTXM-55, aac(3)-IId, aadA1, aadA2b, mdf(A), catA2, cmlA1, qnrS1, sul3, tet(A), dfrA15,	IncFII, IncFIB, p0111	155	129299
EF7-18-57	EF7-18-57	chicken stool	rainy season 2018	E. coli	ESC-R	≤4 mg/L	≤16/2 mg/L	4 mg/L	≤8/4 mg/L	>4/76 mg/L	>8 mg/L	≤2 mg/L	2 mg/L	>8 mg/L	16 mg/L	>2 mg/L	≤2 mg/L	≤1 mg/L	8 mg/L	0.5 mg/L	≤0.25 mg/L	≤1 mg/L	≤0.12 mg/L	≤0.25 mg/L	≤0.25 mg/L	2 mg/L	CTX-M-32 subgroup	done
EF7-18-58	EF7-18-58	chicken stool	rainy season 2018	E. coli	ESC-R	≤4 mg/L	≤16/2 mg/L	4 mg/L	≤8/4 mg/L	>4/76 mg/L	>8 mg/L	≤2 mg/L	4 mg/L	>8 mg/L	16 mg/L	>2 mg/L	≤2 mg/L	≤1 mg/L	8 mg/L	≤0.25 mg/L	≤0.25 mg/L	≤1 mg/L	≤0.12 mg/L	≤0.25 mg/L	≤0.25 mg/L	2 mg/L	CTX-M-32 subgroup	done	done	blaCTX-M-55, aac(3)-lld, aadA1, aadA2b, mdf(A), catA2, cmlA1, qnrS1, sul3, dfrA15	IncFIB(K), IncFII, p0111	155	129299
EF7-18-59	EF7-18-59	chicken stool	rainy season 2018	E. coli	CST-R	≤4 mg/L	≤16/2 mg/L	≤2 mg/L	≤8/4 mg/L	>4/76 mg/L	>8 mg/L	≤2 mg/L	2 mg/L	4 mg/L	8 mg/L	>2 mg/L	≤2 mg/L	≤1 mg/L	≤1 mg/L	≤0.25 mg/L	≤0.25 mg/L	≤1 mg/L	≤0.12 mg/L	4 mg/L	4 mg/L	≤1 mg/L		done	done	mcr-1.1, blaTEM-(?) (partial), aac(3)-Lld, aadA17, aadA5, aph(3'')-lb, aph(6)-ld, sul2, sul3, dfrA15, dfrA17, tet(A)	IncFIB(K), IncP1	ND, bad quality assembly	87158
EF7-18-60	EF7-18-60	chicken stool	rainy season 2018	E. coli	CST-R	≤4 mg/L	≤16/2 mg/L	≤2 mg/L	≤8/4 mg/L	>4/76 mg/L	>8 mg/L	≤2 mg/L	4 mg/L	≤1 mg/L	8 mg/L	≤0.25 mg/L	≤2 mg/L	≤1 mg/L	≤1 mg/L	≤0.25 mg/L	≤0.25 mg/L	≤1 mg/L	≤0.12 mg/L	4 mg/L	4 mg/L	≤1 mg/L		done	done	blaCTX-M-(?), mcr-1.1, aadA1, aph(6)-ld, mdf(A), cmlA1, sul3, dfrA12	IncFIB(K), IncFII(pCoo), p0111	7352	44820

## Sheet: Isolates from travellers
Sample ID (IDs on the left indicate that >1 strain was isolated from the sample)	Strain ID	sample type	sampling date	Species ID (MALDI-TOF MS)	Strain group based on phenotype (EUCAST)	AMI	TIM2	AZT	P/T4	SXT	GEN	FEP	TOB	LEVO	DOX	CIP	MIN	MERO	FOT	TGC	ETP	IMI	DOR	COL	POL	TAZ	Check-MDR CT103XL-new (bla genes detected should be intended as "-group")	rep-PCR	Illumina WGS	ResFinder	PlasmidFinder	ST	cgST
BS15R	BS15R-A	human rectal swab	2018-12-03	E. coli	ESC-R	≤4 mg/L	≤16/2 mg/L	4 mg/L	≤8/4 mg/L	≤0.5/9.5 mg/L	≤1 mg/L	4 mg/L	≤1 mg/L	2 mg/L	>16 mg/L	2 mg/L	8 mg/L	≤1 mg/L	16 mg/L	≤0.25 mg/L	≤0.25 mg/L	≤1 mg/L	≤0.12 mg/L	≤0.25 mg/L	0.5 mg/L	≤1 mg/L	CTX-M-9 group, TEM SNP WT	done	done	blaCTXM-14, blaTEM1B, fosA5, mdf(A), floR, qnrS1, sul2, tet(A),	IncFIB, IncX1, IncY, Col440I	278	1323
BS74R	BS74R-A	human rectal swab	2018-12-11	E. coli	ESC-R	≤4 mg/L	≤16/2 mg/L	8 mg/L	≤8/4 mg/L	≤0.5/9.5 mg/L	≤1 mg/L	≤2 mg/L	≤1 mg/L	≤1 mg/L	≤2 mg/L	0.5 mg/L	≤2 mg/L	≤1 mg/L	16 mg/L	≤0.25 mg/L	≤0.25 mg/L	≤1 mg/L	≤0.12 mg/L	≤0.25 mg/L	≤0.25 mg/L	4 mg/L	CTX-M-15 subgroup	done	done	blaCTXM-15, mdf(A), qnrS1	IncB, p0111	448	86655
BS74R	BS74R-B	human rectal swab	2018-12-11	E. coli	ESC-R	≤4 mg/L	≤16/2 mg/L	>16 mg/L	≤8/4 mg/L	>4/76 mg/L	>8 mg/L	8 mg/L	4 mg/L	≤1 mg/L	>16 mg/L	0.5 mg/L	16 mg/L	≤1 mg/L	>32 mg/L	2 mg/L	≤0.25 mg/L	≤1 mg/L	≤0.12 mg/L	≤0.25 mg/L	≤0.25 mg/L	16 mg/L	CTX-M-32 subgroup, TEM SNP WT	done	done	blaCTXM-55, blaTEM1B, aac(3)-Iid, aadA24, mdf(A), mef(B), floR, qnrS1, sul2, sul3, tet(B), dfrA12	IncY	11088	137881
BS74R	BS74R-D	human rectal swab	2018-12-11	E. coli	CST-R	≤4 mg/L	≤16/2 mg/L	≤2 mg/L	≤8/4 mg/L	>4/76 mg/L	≤1 mg/L	≤2 mg/L	≤1 mg/L	≤1 mg/L	16 mg/L	≤0.25 mg/L	>16 mg/L	≤1 mg/L	≤1 mg/L	≤0.25 mg/L	≤0.25 mg/L	≤1 mg/L	≤0.12 mg/L	>4 mg/L	>4 mg/L	≤1 mg/L		done	done	mcr-1.1, blaTEM1B, aadA2, mdf(A), floR, qnrS1, sul2, sul3, tet(A), tet(M), dfrA12	IncFIA, IncFIB, IncFII, IncX1, IncX4, IncY, Col440I	10	95715
BS90R	BS90R-A	human rectal swab	2018-12-11	E. coli	ESC-R	≤4 mg/L	32/2 mg/L	>16 mg/L	≤8/4 mg/L	≤0.5/9.5 mg/L	>8 mg/L	4 mg/L	8 mg/L	≤1 mg/L	16 mg/L	0.5 mg/L	8 mg/L	≤1 mg/L	32 mg/L	≤0.25 mg/L	≤0.25 mg/L	≤1 mg/L	≤0.12 mg/L	≤0.25 mg/L	≤0.25 mg/L	8 mg/L	CTX-M-32 subgroup, TEM SNP WT	done	done	blaCTXM-55, aac(3)-Iid, mdf(A), qnrS1, tet(A), tet(M)	IncFIA, IncFIB, IncHI1A, IncHI1B, IncQ1, IncX1	654	47983
BS90R	BS90R-D	human rectal swab	2018-12-11	E. coli	CST-R	≤4 mg/L	≤16/2 mg/L	≤2 mg/L	≤8/4 mg/L	>4/76 mg/L	≤1 mg/L	≤2 mg/L	≤1 mg/L	≤1 mg/L	8 mg/L	≤0.25 mg/L	8 mg/L	≤1 mg/L	≤1 mg/L	≤0.25 mg/L	≤0.25 mg/L	≤1 mg/L	≤0.12 mg/L	>4 mg/L	>4 mg/L	≤1 mg/L		done	done	mcr-1.1, blaTEM1B , aadA1, aadA2, mdf(A), cmlA1, qnrS2, sul3, tet(M), dfrA12	IncFIB, IncFII, IncN, IncQ1, IncX1. IncX4, p0111	34	63139
BS115	BS115-A	human rectal swab	2018-11-14	E. coli	CST-R	≤4 mg/L	≤16/2 mg/L	≤2 mg/L	≤8/4 mg/L	≤0.5/9.5 mg/L	≤1 mg/L	≤2 mg/L	≤1 mg/L	≤1 mg/L	≤2 mg/L	≤0.25 mg/L	≤2 mg/L	≤1 mg/L	≤1 mg/L	≤0.25 mg/L	≤0.25 mg/L	≤1 mg/L	≤0.12 mg/L	>4 mg/L	>4 mg/L	≤1 mg/L		done	done	mdf(A)	-	73	9897
BS115R	BS115R-A	human rectal swab	2018-12-24	E. coli	CST-R	≤4 mg/L	≤16/2 mg/L	≤2 mg/L	≤8/4 mg/L	≤0.5/9.5 mg/L	≤1 mg/L	≤2 mg/L	≤1 mg/L	≤1 mg/L	≤2 mg/L	≤0.25 mg/L	≤2 mg/L	≤1 mg/L	≤1 mg/L	≤0.25 mg/L	≤0.25 mg/L	≤1 mg/L	≤0.12 mg/L	>4 mg/L	>4 mg/L	≤1 mg/L		done	done	mdf(A)	-	73	9897
49	49-A	human rectal swab	2019-01-31	E. coli	CST-R	≤4 mg/L	≤16/2 mg/L	≤2 mg/L	≤8/4 mg/L	≤0.5/9.5 mg/L	≤1 mg/L	≤2 mg/L	≤1 mg/L	≤1 mg/L	≤2 mg/L	≤0.25 mg/L	≤2 mg/L	≤1 mg/L	≤1 mg/L	≤0.25 mg/L	≤0.25 mg/L	≤1 mg/L	≤0.12 mg/L	>4 mg/L	>4 mg/L	≤1 mg/L		done	done	mdf(A)	IncFIB, IncFII	327	89745
49	49-C	human rectal swab	2019-01-31	E. coli	CST-R	≤4 mg/L	≤16/2 mg/L	≤2 mg/L	≤8/4 mg/L	≤0.5/9.5 mg/L	≤1 mg/L	≤2 mg/L	≤1 mg/L	≤1 mg/L	≤2 mg/L	≤0.25 mg/L	≤2 mg/L	≤1 mg/L	≤1 mg/L	≤0.25 mg/L	≤0.25 mg/L	≤1 mg/L	≤0.12 mg/L	>4 mg/L	>4 mg/L	≤1 mg/L
16R	16R-A	human rectal swab	2019-02-18	E. coli	ESC-R	≤4 mg/L	32/2 mg/L	>16 mg/L	≤8/4 mg/L	>4/76 mg/L	≤1 mg/L	16 mg/L	≤1 mg/L	≤1 mg/L	≤2 mg/L	≤0.25 mg/L	≤2 mg/L	≤1 mg/L	>32 mg/L	≤0.25 mg/L	≤0.25 mg/L	≤1 mg/L	≤0.12 mg/L	≤0.25 mg/L	≤0.25 mg/L	16 mg/L	CTX-M-1 group	done	done	aadA1, aph(3'')-Ib, aph(6)-Id, blaCTXM-15, mdf(A), sul2, dfrA1,	IncFIB, IncFII	38	140254
16R	16R-B	human rectal swab	2019-02-18	E. coli	ESC-R/CST-R	≤4 mg/L	≤16/2 mg/L	>16 mg/L	≤8/4 mg/L	>4/76 mg/L	≤1 mg/L	16 mg/L	≤1 mg/L	≤1 mg/L	≤2 mg/L	≤0.25 mg/L	≤2 mg/L	≤1 mg/L	>32 mg/L	≤0.25 mg/L	≤0.25 mg/L	≤1 mg/L	≤0.12 mg/L	>4 mg/L	>4 mg/L	16 mg/L	CTX-M-1 group	done	done	aadA1, aph(3'')-Ib, aph(6)-Id, blaCTXM-15, mdf(A), sul2, dfrA1,	IncFIB, IncFII	38	140254
16R	16R-C	human rectal swab	2019-02-18	E. coli	CST-R	≤4 mg/L	≤16/2 mg/L	≤2 mg/L	≤8/4 mg/L	>4/76 mg/L	>8 mg/L	≤2 mg/L	8 mg/L	≤1 mg/L	8 mg/L	≤0.25 mg/L	4 mg/L	≤1 mg/L	≤1 mg/L	≤0.25 mg/L	≤0.25 mg/L	≤1 mg/L	≤0.12 mg/L	>4 mg/L	4 mg/L	≤1 mg/L		done	done	mcr-1.1, blaTEM1B, aac(3)-Iid, aadA5, aph(3'')-Ib, aph(6)-Id, mdf(A), mph(A), sul1, sul2, tet(A), dfrA17,	IncFIB, IncFII, IncI2, Col156, ColpVC,	11087	137880
